# Supplementary material for: Biological Approaches Promise Innovative and Sustainable Management of Powdery Mildew in Lebanese Squash
Source: MDPI journal article supplement (doi:10.3390/su14052811), 2022-02-28
Supplement: s1 [file s1]

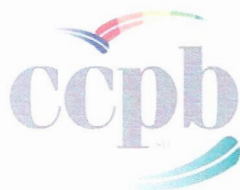

**CONFORMITY CERTIFICATE**  
**Organic Production Standard of CCPB**  
**Equivalent to EC Reg. n. 834/2007**  
**CERTIFICATO DI CONFORMITA'**  
**Documentary evidence – Documento giustificativo**

**Mod. CC/LB**  
Rev. 1 del 2014-12-15  
Pag. 1/ 3

The present document certifies that the operator:  
*Il presente documento certifica che l'operatore :*

**LEBANESE AGRICULTURAL RESEARCH INSTITUTE**  
**LARI KLEIAAT**

code: **L0453**

With head office in • *Con sede sociale in:* **El Roumieh –Kleiaat- Kesrwan- Lebanon**

And production unit in • *E sito produttivo in:* **El Roumieh –Kleiaat- Kesrwan- Lebanon**

is controlled by • *è controllato da:* **CCPB srl**

according to art. 33.3 of EC Reg. n. 834/2007 for the following activities  
*ai sensi dell'art. 33.3 del Reg. CE n. 834/2007 relativamente all'attività di:*

**Plant production**

The certificate refers only to the specific activity indicated and authorizes the operator to issue Conformity declaration(s) only for the products listed in the Annex to the present certificate.

*Il certificato si riferisce esclusivamente all'attività indicata ed autorizza l'operatore ad emettere Dichiarazioni di Conformità per i soli prodotti elencati nell'allegato al presente certificato.*

Issue date  
*Data di emissione*

**01/12/2017**

**CC/LB 06253**

Protocol number  
*Numero di protocollo*

First issue date  
*Data di prima emissione*

**19/11/2014**

**30/05/2019**

Expiration date  
*Data scadenza*

Inspection date

**24/11/2017**

*Data del controllo*

The present document has been issued on the basis of Article 29(1) of Regulation (EC) No 834/2007 and of Regulation (EC) No 889/2008. The declared operator has submitted his activities under control according Article 33(3) of Regulation (EC) No 834/2007, and meets the requirements of the Organic Production Standard of CCPB equivalent to EC Reg. n. 834/2007. The present certificate is still valid until the operator remains in compliance with the requirements of the Organic Production Standard of CCPB and the contract signed with CCPB srl. The verification of compliance is subject to surveillance of CCPB srl. Any issue related to civil legal responsibility will be treated according the laws in force. The certification documents of the service are kept at the offices of CCPB srl.

*Il presente documento è stato rilasciato sulla base dell'articolo 29, paragrafo 1, del regolamento (CE) n. 834/2007 e del regolamento (CE) n. 889/2008. L'operatore oggetto della dichiarazione ha sottoposto a controllo le sue attività secondo l'articolo 33.3 del Regolamento CE 834/2007, e soddisfa i requisiti previsti dallo Standard di Produzione Biologica di CCPB equivalente al Reg CE 834/2007. Il presente certificato resta valido finché l'operatore rispetta i requisiti dello Standard di Produzione Biologica di CCPB e del contratto stipulato con CCPB srl. La verifica del rispetto è soggetta ad attività di sorveglianza da parte di CCPB srl. Eventuali problemi relativi alla responsabilità civile saranno trattati secondo le leggi vigenti. La documentazione del servizio di certificazione è conservata presso gli uffici di CCPB srl.*

**Annex:** list of authorized products  
**Allegato:** elenco dei prodotti certificate

**DISTRIBUTION LIST:** controlled operator  
**LISTA DI DISTRIBUZIONE:** operatore controllato

Regional Inspection Activities

Coordinator Lebanon

Youssef Khoury

CCPB srl  
Viale Masini 36 - 40126 Bologna (Italy)  
IMC Liban  
Tawak Building - Chalet Suisse Street  
Ezzahra - Beirut (Lebanon)

**Control Body Code: LB-BIO-102**  
**Codice Organismo di Controllo: LB-BIO-102**

The requests concerning the verification of the present certificate should be sent to:  
*Le richieste inerenti la verifica del presente certificato vanno indirizzate a:*

**CCPB srl**

Viale Masini 36 – I 40126 Bologna Tel. +39-051-6089811 Fax +39-051-254842

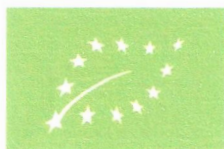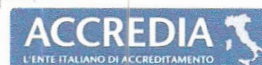

PRD N° 0043 B ISP N° 0083 E DAP N° 0007 H  
Membro degli Accordi di Mutuo Riconoscimento  
EA, IAF e ILAC  
Signatory of EA, IAF and ILAC  
Mutual Recognition Agreements

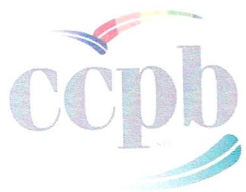

**CONFORMITY CERTIFICATE**  
**Organic Production Standard of CCPB**  
**Equivalent to EC Reg. n. 834/2007**  
**CERTIFICATO DI CONFORMITA'**  
**Documentary evidence – Documento giustificativo**

**Mod. CC/LB**  
Rev. 1 del 2014-12-15  
Pag. 2/ 3

Annex to **CC/LB 06253 of 01/12/2017**  
Allegato al

Granted to the operator • rilasciato all'operatore:

**LEBANESE AGRICULTURAL RESEARCH INSTITUTE**  
**LARI KLEIAAT**  
code: **L0453**

**List of authorized products** • elenco dei prodotti autorizzati:

| product     | prodotto  | product specifications<br>specifiche di prodotto | type<br>tipo | Code product<br>Codice prodotto |
|-------------|-----------|--------------------------------------------------|--------------|---------------------------------|
| Basilic     | Basilico  | ***                                              | BIO          | ***                             |
| Beans       | Fagioli   | Rabbikha                                         | BIO          | ***                             |
| Blueberry   | Mirtillo  | ***                                              | BIO          | ***                             |
| Cabbage     | Cavolo    | ***                                              | BIO          | ***                             |
| Cedar       | Cedro     | ***                                              | BIO          | ***                             |
| Corn        | Mais      | ***                                              | BIO          | ***                             |
| Cucumber    | Cetriolo  | ***                                              | BIO          | ***                             |
| Eggplant    | Melanzana | Small; Big                                       | BIO          | ***                             |
| Grapes      | Uva       | ***                                              | BIO          | ***                             |
| Kiwi        | Kiwi      | ***                                              | BIO          | ***                             |
| Lavande     | Lavanda   | ***                                              | BIO          | ***                             |
| Lettuce     | Lattuga   | Lollo rosso; Iceburg                             | BIO          | ***                             |
| Mint        | Menta     | ***                                              | BIO          | ***                             |
| Nerium      | Oleandro  | ***                                              | BIO          | ***                             |
| Olive       | Oliva     | ***                                              | BIO          | ***                             |
| Oregano     | Origano   | ***                                              | BIO          | ***                             |
| Pepper      | Pepe      | Hot; Sweet                                       | BIO          | ***                             |
| Pomegranate | Melagrano | ***                                              | BIO          | ***                             |
| Rosemary    | Rosmarino | ***                                              | BIO          | ***                             |
| Roses       | Rose      | ***                                              | BIO          | ***                             |
| Squash      | Zucca     | ***                                              | BIO          | ***                             |
| Strawberry  | Fragola   | ***                                              | BIO          | ***                             |
| Tomato      | Pomodoro  | Jabali; Cherry                                   | BIO          | ***                             |

Legend of the "type" column: If it is stated **BIO** it means that the product is "organic"; **ING** means the product contains organic ingredients; **CONV** means the product is in "conversion to organic farming"; **UB** means the product made with "organic grapes"; **UC** means product is made with "grapes in conversion to organic farming"; **MB** means "organic" feed; **MI** means feed is "can be used in organic farming".

Legenda della colonna TIPO. Se è indicato **BIO** il prodotto è "biologico"; se **ING** il prodotto contiene ingredienti biologici; se **CONV** il prodotto è in "conversione all'agricoltura biologica"; se **UB** il prodotto è a base di "uva biologica"; se **UC** il prodotto è a base di "uva in conversione all'agricoltura biologica"; se **MB** il mangime è "biologico"; se **MI** il mangime è "impiegabile in agricoltura biologica".

**Control Body Code: LB-BIO-102**  
**Codice Organismo di Controllo: LB-BIO-102**

The requests concerning the verification of the present certificate should be sent to:  
Le richieste inerenti la verifica del presente certificato vanno indirizzate a:

**CCPB srl**

Viale Masini 36 – I 40126 Bologna Tel. +39-051-6089811 Fax +39-051-254842

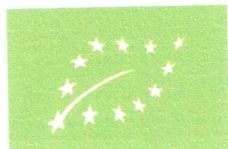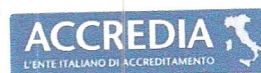

PRD N° 0043 B ISPN° 0083 E DAPN° 0007 H  
Membro degli Accordi di Mutuo Riconoscimento  
EA, IAF e ILAC  
Signatory of EA, IAF and ILAC  
Mutual Recognition Agreements



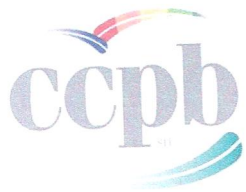

**CONFORMITY CERTIFICATE**  
**Organic Production Standard of CCPB**  
**Equivalent to EC Reg. n. 834/2007**  
**CERTIFICATO DI CONFORMITA'**  
**Documentary evidence – Documento giustificativo**

**Mod. CC/LB**  
Rev. 1 del 2014-12-15  
Pag. 3/ 3

The operator is authorized to issue conformity declarations with the Organic Production Standard of CCPB equivalent to EC Reg. n. 834/2007 only for the products listed. If in the list is present also the product code, those declarations can be issued directly on the commercial packaging. The operator is directly responsible for the correct use of this certificate and may issue Conformity Declaration only if it meets the requirements of the Organic Production Standard of CCPB equivalent to EC Reg. n. 834/2007 and legislation in force applicable to certified products.

The operator must avoid providing publicity indications or other advertising information that may create confusion with non-certified products. In particular, this document does not certify compliance with other requirements that do not belong to the scope of certification; the responsibility of CCPB is limited to the reference of the Organic Production Standard of CCPB, for which this certificate is issued and does not extend to other standards related to other characteristics may be cited concerning the listed products.

*L'operatore è autorizzato a rilasciare Dichiarazioni di Conformità allo Standard di Produzione Biologica di CCPB equivalente al Reg. CE 834/2007, solo per i prodotti elencati. Se nell'elenco è presente anche il codice prodotto, tali dichiarazioni possono essere rilasciate direttamente sulle confezioni commerciali. L'operatore è direttamente responsabile del corretto utilizzo di questo certificato e può rilasciare dette dichiarazioni, solo se rispetta i requisiti dello Standard di Produzione Biologica di CCPB equivalente al Reg. CE 834/2007 e della normativa cogente applicabile ai prodotti certificati.*

*L'operatore non deve fornire indicazioni pubblicitarie o altro che possano creare confusione con prodotti non certificati. In particolare, il presente documento non attesta la conformità ad altri requisiti che non rientrino nello scopo di certificazione; la responsabilità di CCPB è limitata alle norme di riferimento per lo Standard di Produzione Biologica di CCPB, per le quali è emesso il presente certificato e non si estende ad altre norme riferite ad altre caratteristiche eventualmente citate per i prodotti di cui trattasi.*

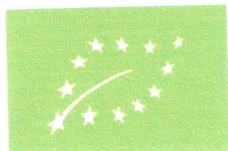

**Control Body Code: LB-BIO-102**  
**Codice Organismo di Controllo: LB-BIO-102**

The requests concerning the verification of the present certificate should be sent to:  
*Le richieste inerenti la verifica del presente certificato vanno indirizzate a:*

**CCPB srl**

Viale Masini 36 – I 40126 Bologna Tel. +39-051-6089811 Fax +39-051-254842

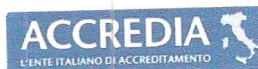

PRD N° 0043 B ISP N° 0083 E DAP N° 0007 H  
Membro degli Accordi di Mutuo Riconoscimento  
EA, IAF e ILAC  
Signatory of EA, IAF and ILAC  
Mutual Recognition Agreements

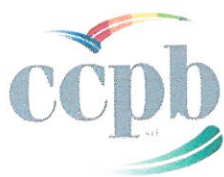

**CONFORMITY CERTIFICATE**  
**Organic Production Standard of CCPB**  
**Equivalent to EC Reg. n. 834/2007**  
**CERTIFICATO DI CONFORMITA'**  
**Documentary evidence – Documento giustificativo**

**Mod. CC/LB**  
Rev. 1 del 2014-12-15  
Pag. 1/ 2

The present document certifies that the operator:  
*Il presente documento certifica che l'operatore :*

**LEBANESE AGRICULTURAL RESEARCH INSTITUTE**  
**LARI KLEIAAT**

code: **L0453**

With head office in • *Con sede sociale in:* **El Roumieh –Kleiaat- Kesrwan- Lebanon**

And production unit in • *E sito produttivo in:* **El Roumieh –Kleiaat- Kesrwan- Lebanon**

is controlled by • *è controllato da:* **CCPB srl**

according to art. 33.3 of EC Reg. n. 834/2007 for the following activities  
*ai sensi dell'art. 33.3 del Reg. CE n. 834/2007 relativamente all'attività di:*

**Plant production**

The certificate refers only to the specific activity indicated and authorizes the operator to issue Conformity declaration(s) only for the products listed in the Annex to the present certificate.

*Il certificato si riferisce esclusivamente all'attività indicata ed autorizza l'operatore ad emettere Dichiarazioni di Conformità per i soli prodotti elencati nell'allegato al presente certificato.*

|                                                    |                   |                           |                                                |
|----------------------------------------------------|-------------------|---------------------------|------------------------------------------------|
| Issue date<br><i>Data di emissione</i>             | <b>30/11/2020</b> | <b>CC/LB10014</b>         | Protocol number<br><i>Numero di protocollo</i> |
| First issue date<br><i>Data di prima emissione</i> | <b>19/11/2014</b> | <b>29/05/2022</b>         | Expiration date<br><i>Data scadenza</i>        |
| Inspection date                                    | <b>10/07/2020</b> | <i>Data del controllo</i> |                                                |

The present document has been issued on the basis of Article 29(1) of Regulation (EC) No 834/2007 and of Regulation (EC) No 889/2008. The declared operator has submitted his activities under control according Article 33(3) of Regulation (EC) No 834/2007, and meets the requirements of the Organic Production Standard of CCPB equivalent to EC Reg. n. 834/2007. The present certificate is still valid until the operator remains in compliance with the requirements of the Organic Production Standard of CCPB and the contract signed with CCPB srl. The verification of compliance is subject to surveillance of CCPB srl. Any issue related to civil legal responsibility will be treated according the laws in force. The certification documents of the service are kept at the offices of CCPB srl.

*Il presente documento è stato rilasciato sulla base dell'articolo 29, paragrafo 1, del regolamento (CE) n. 834/2007 e del regolamento (CE) n. 889/2008. L'operatore oggetto della dichiarazione ha sottoposto a controllo le sue attività secondo l'articolo 33.3 del Regolamento CE 834/2007, e soddisfa i requisiti previsti dallo Standard di Produzione Biologica di CCPB equivalente al Reg CE 834/2007. Il presente certificato resta valido finché l'operatore rispetta i requisiti dello Standard di Produzione Biologica di CCPB e del contratto stipulato con CCPB srl. La verifica del rispetto è soggetta ad attività di sorveglianza da parte di CCPB srl. Eventuali problemi relativi alla responsabilità civile saranno trattati secondo le leggi vigenti. La documentazione del servizio di certificazione è conservata presso gli uffici di CCPB srl.*

**Annex:** list of authorized products  
**Allegato:** elenco dei prodotti certificate

**DISTRIBUTION LIST:** controlled operator  
**LISTA DI DISTRIBUZIONE:** operatore controllato

**Regional Inspection Activities**  
**Coordinator Lebanon**  
**Youssef Khoury**

**CCPB Middle East s.a.l.**  
Tawk Building - Chalet Suisse Street  
Fanar - Beirut (Lebanon)  
RC BEIRUT 1003614  
Capital 150.000.000 LBP

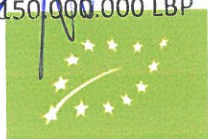

**Control Body Code: LB-BIO-102**  
**Codice Organismo di Controllo: LB-BIO-102**

The requests concerning the verification of the present certificate should be sent to:  
*Le richieste inerenti la verifica del presente certificato vanno indirizzate a:*

**CCPB srl**

Viale Masini 36 – I 40126 Bologna Tel. +39-051-6089811 Fax +39-051-254842

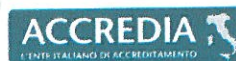

PRD N° 0043 B ISP N° 0083 E DAP N° 0007 H  
Membro degli Accordi di Mutuo Riconoscimento  
FA, IAF e ILAC  
Signatory of EA, IAF and ILAC  
Mutual Recognition Agreements



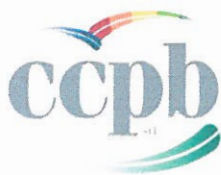

**CONFORMITY CERTIFICATE**  
**Organic Production Standard of CCPB**  
**Equivalent to EC Reg. n. 834/2007**  
**CERTIFICATO DI CONFORMITA'**  
**Documentary evidence – Documento giustificativo**

**Mod. CC/LB**  
Rev. 1 del 2014-12-15  
Pag. 2/ 2

Annex to  
Allegato al **CC/LB 10014 of 30/11/2020**

Granted to the operator • rilasciato all'operatore:

**LEBANESE AGRICULTURAL RESEARCH INSTITUTE**  
**LARI KLEIAAT**  
code: **L0453**

**List of authorized products** • elenco dei prodotti autorizzati:

| product     | prodotto  | product specifications<br>specifiche di prodotto | type<br>tipo | Code product<br>Codice prodotto |
|-------------|-----------|--------------------------------------------------|--------------|---------------------------------|
| Blueberry   | Mirtillo  | ***                                              | BIO          | ***                             |
| Cedar       | Cedro     | ***                                              | BIO          | ***                             |
| Grape       | Uva       | ***                                              | BIO          | ***                             |
| Kiwi        | Kiwi      | ***                                              | BIO          | ***                             |
| Lavander    | Lavanda   | ***                                              | BIO          | ***                             |
| Nerium      | Oleandro  | ***                                              | BIO          | ***                             |
| Olive       | Olive     | ***                                              | BIO          | ***                             |
| Oregano     | Origano   | ***                                              | BIO          | ***                             |
| Pomegranate | Melagrano | ***                                              | BIO          | ***                             |
| Rosemary    | Rosmarino | ***                                              | BIO          | ***                             |
| Roses       | Rose      | ***                                              | BIO          | ***                             |

Legend of the "type" column: If it is stated **BIO** it means that the product is "organic"; **ING** means the product contains organic ingredients; **CONV** means the product is in "conversion to organic farming"; **UB** means the product made with "organic grapes"; **UC** means product is made with "grapes in conversion to organic farming"; **MB** means "organic" feed; **MI** means feed is "can be used in organic farming".

Legenda della colonna TIPO. Se è indicato **BIO** il prodotto è "biologico"; se **ING** il prodotto contiene ingredienti biologici; se **CONV** il prodotto è in "conversione all'agricoltura biologica"; se **UB** il prodotto è a base di "uva biologica"; se **UC** il prodotto è a base di "uva in conversione all'agricoltura biologica"; se **MB** il mangime è "biologico"; se **MI** il mangime è "impiegabile in agricoltura biologica".

The operator is authorized to issue conformity declarations with the Organic Production Standard of CCPB equivalent to EC Reg. n. 834/2007 only for the products listed. If in the list is present also the product code, those declarations can be issued directly on the commercial packaging. The operator is directly responsible for the correct use of this certificate and may issue Conformity Declaration only if it meets the requirements of the Organic Production Standard of CCPB equivalent to EC Reg. n. 834/2007 and legislation in force applicable to certified products.

The operator must avoid providing publicity indications or other advertising information that may create confusion with non-certified products.

In particular, this document does not certify compliance with other requirements that do not belong to the scope of certification; the responsibility of CCPB is limited to the reference of the Organic Production Standard of CCPB, for which this certificate is issued and does not extend to other standards related to other characteristics may be cited concerning the listed products.

L'operatore è autorizzato a rilasciare Dichiarazioni di Conformità allo Standard di Produzione Biologica di CCPB equivalente al Reg. CE 834/2007, solo per i prodotti elencati. Se nell'elenco è presente anche il codice prodotto, tali dichiarazioni possono essere rilasciate direttamente sulle confezioni commerciali. L'operatore è direttamente responsabile del corretto utilizzo di questo certificato e può rilasciare dette dichiarazioni, solo se rispetta i requisiti dello Standard di Produzione Biologica di CCPB equivalente al Reg. CE 834/2007 e della normativa cogente applicabile ai prodotti certificati.

L'operatore non deve fornire indicazioni pubblicitarie o altro che possano creare confusione con prodotti non certificati. In particolare, il presente documento non attesta la conformità ad altri requisiti che non rientrino nello scopo di certificazione; la responsabilità di CCPB è limitata alle norme di riferimento per lo Standard di Produzione Biologica di CCPB, per le quali è emesso il presente certificato e non si estende ad altre norme riferite ad altre caratteristiche eventualmente citate per i prodotti di cui trattasi.

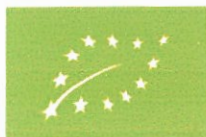

**Control Body Code: LB-BIO-102**  
**Codice Organismo di Controllo: LB-BIO-102**

The requests concerning the verification of the present certificate should be sent to:  
Le richieste inerenti la verifica del presente certificato vanno indirizzate a:

**CCPB srl**

Viale Masini 36 – I 40126 Bologna Tel. +39-051-6089811 Fax +39-051-254842

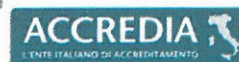

PRD N° 0043 B ISP N° 0083 E DAP N° 0007 H  
Membro degli Accordi di Mutuo Riconoscimento  
FA, IAF e IAC.  
Signatory of FA, IAF and IAC  
Mutual Recognition Agreements

### Supplementary File S3: Equations used for parameters evaluation

$$\text{Disease Severity (\%)} = \frac{[\sum(\text{Number of infected leaves in each category}) \times (\text{Numeric value of disease category})]}{(\text{Total number of examined leaves in sample} \times 5)} \times 100$$

$$\text{Disease Incidence (\%)} = \frac{(\text{Number of infected leaves})}{(\text{Total number of examined leaves})} \times 100$$

$$\text{Reduction in Disease Severity (\%)} = \frac{(\text{Disease severity of the control}) - (\text{Disease severity of the treatment})}{(\text{Disease severity of the control})} \times 100$$

$$\begin{aligned} &\text{Reduction in Disease Incidence (\%)} \\ &= \frac{(\text{Disease incidence of the control}) - (\text{Disease incidence of the treatment})}{(\text{Disease incidence of the control})} \times 100 \end{aligned}$$
